# Supplementary figures and images for: Model‐Based Characterization of the Pharmacokinetics of Pembrolizumab: A Humanized Anti–PD‐1 Monoclonal Antibody in Advanced Solid Tumors
Source: PubMed Central journal article supplement — CPT Pharmacometrics Syst Pharmacol. 2016 Nov 14;6(1):49–57. doi: 10.1002/psp4.12139 (PMC5270291; doi:10.1002/psp4.12139), 2016-11-14

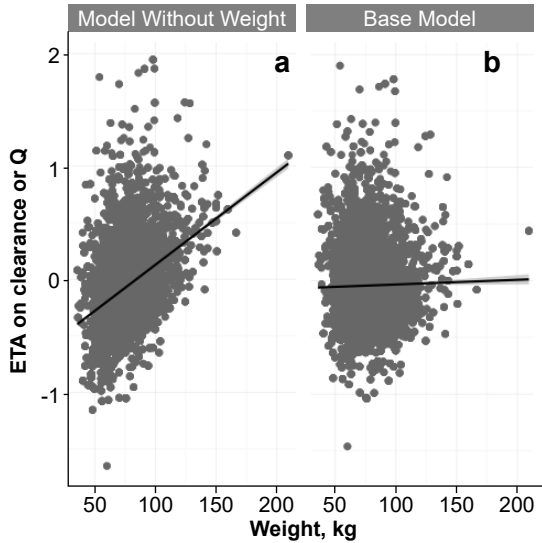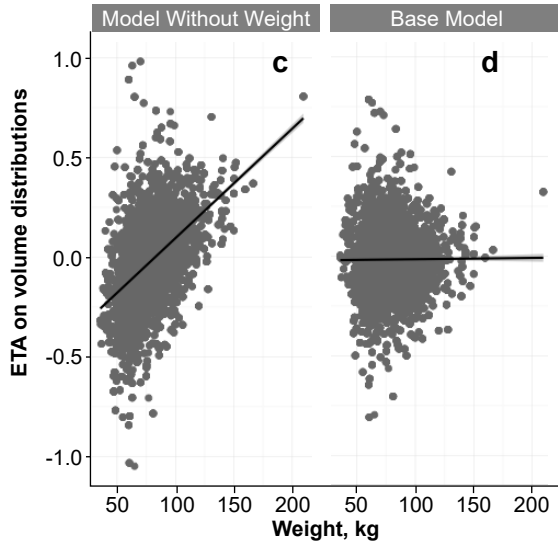

Supplement: PSP4-6-49-s003.pdf [file PSP4-6-49-s003.pdf]

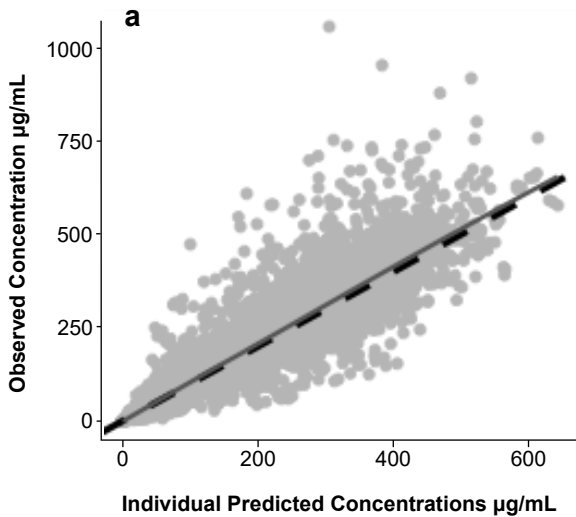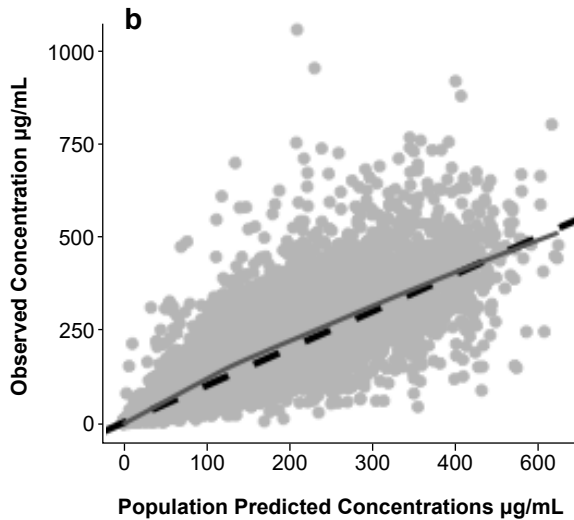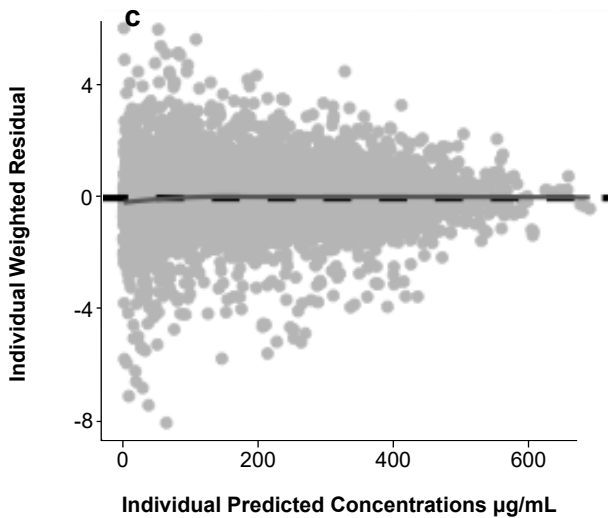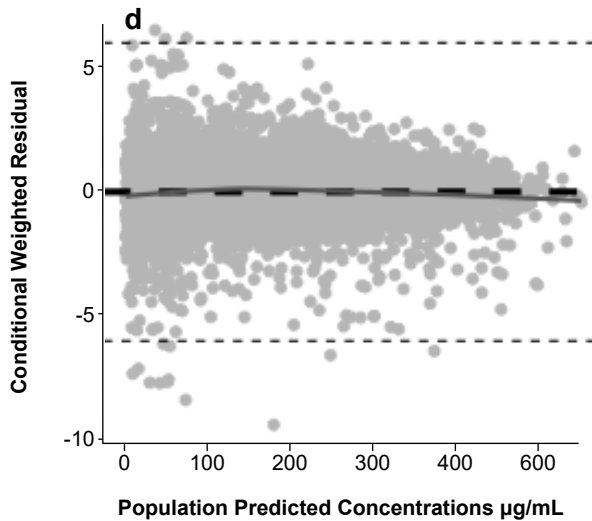

Supplement: PSP4-6-49-s004.pdf [file PSP4-6-49-s004.pdf]

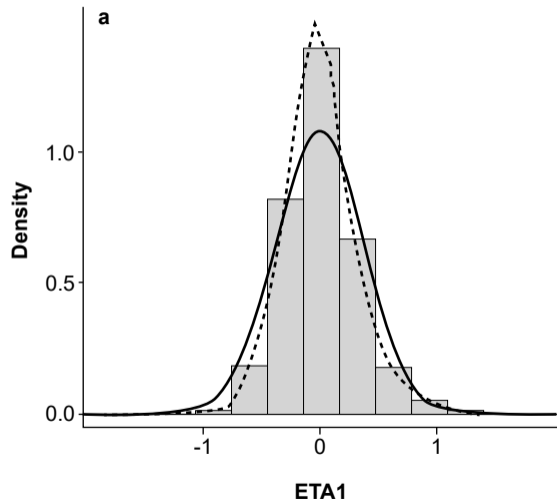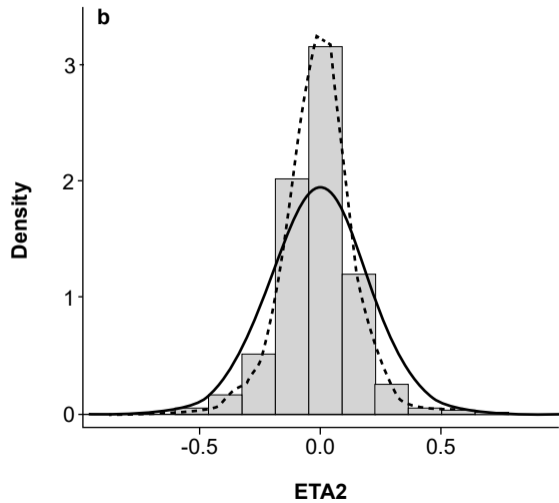

Supplement: PSP4-6-49-s005.pdf [file PSP4-6-49-s005.pdf]

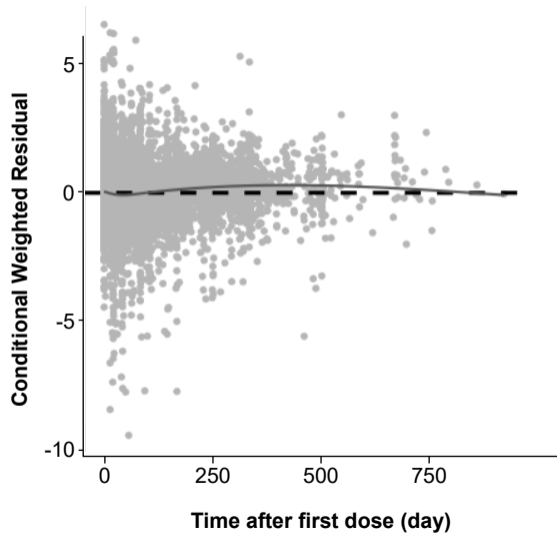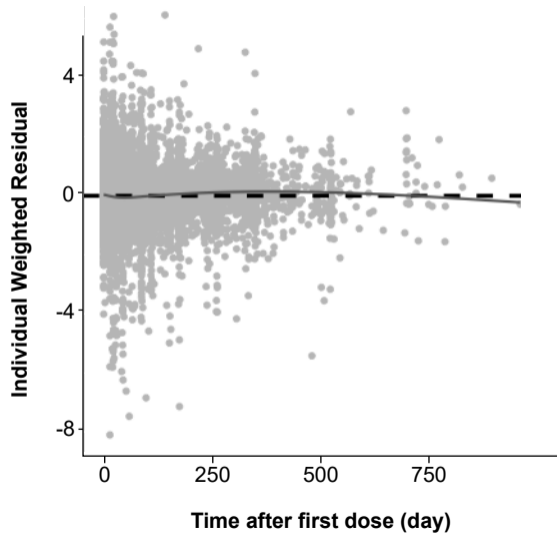

Supplement: PSP4-6-49-s006.pdf [file PSP4-6-49-s006.pdf]

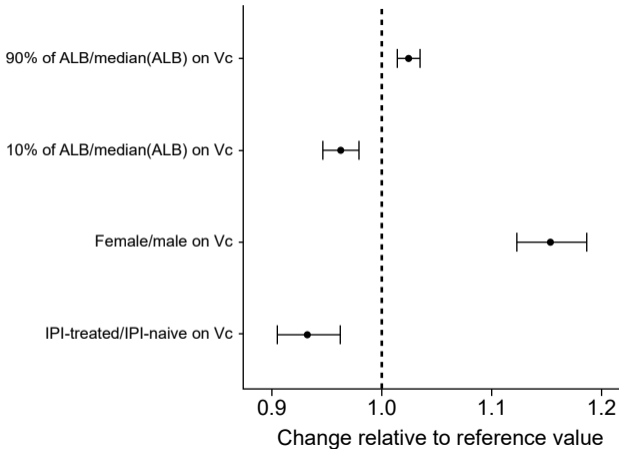

Supplement: PSP4-6-49-s007.pdf [file PSP4-6-49-s007.pdf]
